# Supplementary material for: Validation of the Saint George’s Respiratory Questionnaire in Uganda
Source: PubMed Central journal article supplement (PMC6045769; doi:10.1136/bmjresp-2018-000276), 2018-07-11
Supplement: bmjresp-2018-000276supp001.pdf [file bmjresp-2018-000276supp001.pdf]

## Validation of the SGRQ in Uganda

**Supplementary Table 1.** Comparison of demographic factors between sampled community members and LiNK cohort participants from Nakaseke, Uganda. *P* value represents results from t-test or chi-squared test.

|                                                  | SGRQ Sample<br>(5.8%, n=54) | Balance of Cohort<br>(94.2%, n=877) | <i>p</i> value |
|--------------------------------------------------|-----------------------------|-------------------------------------|----------------|
| <b>Demographics: % (n) or mean (sd)</b>          |                             |                                     |                |
| Age (years)                                      | 49.1 (11.6)                 | 49.2 (11.4)                         | 0.96           |
| Being Female                                     | 55.6% (30)                  | 54.7% (480)                         | 0.91           |
| Body mass index (kg/m <sup>2</sup> )             | 24.0 (5.4)                  | 23.9 (4.6)                          | 0.94           |
| Primary Education or Less                        | 83.3% (45)                  | 79.6% (697)                         | 0.50           |
| Household Size >3 People                         | 70.4% (38)                  | 67.1% (588)                         | 0.62           |
| <b>Risk Factors: % (n)</b>                       |                             |                                     |                |
| Current Smoking                                  | 13.0% (7)                   | 15.2% (133)                         | 0.66           |
| Obesity (Body mass index ≥30 kg/m <sup>2</sup> ) | 16.7% (9)                   | 10.6% (93)                          | 0.17           |
| Self-Reported HIV                                | 7.0% (3)                    | 10.5% (74)                          | 0.46           |
| Self-Reported Tuberculosis                       | 9.8% (4)                    | 2.4% (18)                           | 0.005          |
| Household Biomass Use                            | 98.2% (53)                  | 99.6% (872)                         | 0.10           |
| <b>Pre-Bronchodilator Spirometry: mean (sd)</b>  |                             |                                     |                |
| FEV1 (L)                                         | 2.16 (0.75)                 | 2.44 (0.65)                         | 0.003          |
| % Predicted                                      | 0.81 (0.23)                 | 0.94 (0.19)                         | <0.001         |
| FVC (L)                                          | 2.95 (0.83)                 | 3.11 (0.77)                         | 0.14           |
| % Predicted                                      | 0.90 (0.17)                 | 0.96 (0.17)                         | 0.007          |
| FEV1/FVC Ratio                                   | 71.7 (13.6)                 | 78.2 (7.98)                         | <0.001         |
| % Predicted                                      | 0.89 (0.16)                 | 0.97 (0.09)                         | <0.001         |
| <b>Symptoms: % (n)</b>                           |                             |                                     |                |
| Cough                                            | 18.9% (10)                  | 6.8% (52)                           | 0.001          |
| Phlegm                                           | 9.4% (5)                    | 3.9% (29)                           | 0.12           |
| Wheeze                                           | 8.5% (4)                    | 2.9% (22)                           | 0.037          |
| Dyspnea with exertion                            | 19.2% (9)                   | 8.8% (66)                           | 0.018          |

## Validation of the SGRQ in Uganda

**Supplementary Table 2.** Comparison of COPD severity<sup>a</sup> between sampled COPD-positive participants and all COPD-positive participants from Nakaseke, Uganda. *P* value represents result from chi-squared test.

|                                    | In Sample<br>(22.4%, n=19) <sup>b</sup> | Out of Sample<br>(77.7%, n=66) | <i>p</i> value |
|------------------------------------|-----------------------------------------|--------------------------------|----------------|
| <b>COPD Severity: % (<i>n</i>)</b> |                                         |                                | 0.01           |
| Mild                               | 21.1% (4)                               | 56.1% (37)                     |                |
| Moderate                           | 52.6% (10)                              | 36.4% (24)                     |                |
| Severe                             | 26.3% (5)                               | 7.6% (5)                       |                |
| Very Severe                        | 0% (0)                                  | 0% (0)                         |                |

<sup>a</sup> Using GOLD criteria for post-bronchodilator spirometry

<sup>b</sup> One dropped for poor-quality spirometry

**Supplementary Table 3.** Association of SGRQ total and category scores with respiratory symptoms. The results represent the increase in odds for having the respiratory symptom outcome based on a unit increase in SGRQ score from multivariable logistic regression analysis. All models are adjusted for age and sex.

|                                                  | Wheeze<br>8.5% (4) | Phlegm<br>9.4% (5) | Dyspnea<br>19.2% (9) | Cough<br>18.9% (10) |
|--------------------------------------------------|--------------------|--------------------|----------------------|---------------------|
| <b>Respiratory Symptoms: odds ratio (95% CI)</b> |                    |                    |                      |                     |
| Symptoms                                         | 1.04 (1.00 – 1.09) | 1.09 (1.02 – 1.17) | 1.05 (1.01 – 1.09)   | 1.06 (1.02 – 1.10)  |
| Activity                                         | 1.02 (0.98 – 1.06) | 1.07 (1.01 – 1.12) | 1.03 (1.00 – 1.06)   | 1.06 (1.02 – 1.10)  |
| Impacts                                          | 1.04 (0.99 – 1.09) | 1.07 (1.02 – 1.13) | 1.05 (1.01 – 1.09)   | 1.06 (1.02 – 1.10)  |
| Total                                            | 1.04 (0.99 – 1.09) | 1.08 (1.02 – 1.14) | 1.05 (1.01 – 1.09)   | 1.07 (1.03 – 1.11)  |
